# Supplementary material
Source: PubMed Central journal article supplement (PMC3271797)
Supplement: NIHMS346380-supplement-1_si_001.pdf [file NIHMS346380-supplement-1_si_001.pdf]

## Supplemental Information

### *The affect of A $\beta$ (39-42) on A $\beta$ Aggregation*

As demonstrated in the main text, A $\beta$ 42 only formed dimers through hexamers in our experiments in the presence of A $\beta$ (39-42). For a qualitative assessment of the features in the ATD of  $z/n = -5/2$ , an injection energy study was performed. In an injection energy study, ions stored in the ion funnel are pulsed into the drift cell with a voltage,  $V$ . The translational energy given to the molecules is transferred through collisions with the Helium gas inside the drift cell leading first to internal excitation followed by thermalization. At high injection voltages, large noncovalent complexes, if present, may dissociate into small subunits. Figure S1 shows the ATD of  $z/n = -5/2$  of a 5:1 A $\beta$ (39-42):A $\beta$ 42 mixture. At 40 V, three features are present at 600, 640, and 690  $\mu$ s (Figure S1a). As the injection energy is increased to 100V, the distribution shifts: the feature at 600  $\mu$ s is diminished substantially and the feature at 690  $\mu$ s dominates (Figure S1b). As no other features appear at longer times, the feature at 690  $\mu$ s may be assigned as the  $z = -5$  dimer. Higher order oligomers with the same value of  $z/n$  always appear at shorter arrival times, allowing the feature at 600  $\mu$ s to be assigned as the  $z = -15$  hexamer and the feature at 640  $\mu$ s as the  $z = -10$  tetramer. No other peaks appear at shorter arrival times, indicating that under the conditions of our experiment, the largest oligomer observed is the hexamer.

The A $\beta$ :CTF mixtures were held at 30°C for up to three weeks and reanalyzed using IM-MS. Figure S2 shows the ATD of  $z/n = -5/2$  in a 1:5 mixture at  $t = 0$  (a) and  $t = 21$  d (b). The overall signal is significantly lower in (b), suggesting that the sample has aggregated. Large aggregates often clog the nano-ESI tips used in these experiments, lowering or even eliminating the analyte signal. Furthermore, as A $\beta$  aggregates, the concentration of small oligomers in solution decreases, likely contributing to the low signal shown in this ATD. Still, similar features are visible in both ATDs, indicating that A $\beta$ 42 does not form decamer and dodecamer in the presence of 5-fold excess A $\beta$ (39-42), even once larger aggregates have formed.

Similar experiments were performed with a 1:1 A $\beta$ 42:A $\beta$ (39-42) mixture. The ATD of  $z/n = -5/2$  of the mixture contains the same features as that of A $\beta$ 42 in the absence of inhibitor (Figure S3). This result indicates that one equivalent of A $\beta$ (39-42) is not sufficient to modulate the assembly of A $\beta$ 42.

An arrival time distribution was also recorded for the peak at  $m/z = 1810$  in Figure 5 of the main text, which represents an  $n[2A\beta_{42} + A\beta(39-42)]^{-5n}$  species (Figure S4). Two features are present with cross sections that, although slightly larger than those of  $A\beta_{40}$  alone, closely correspond to a dimer and a tetramer of  $A\beta_{40}$  ( $1327 \text{ \AA}^2$  and  $2205 \text{ \AA}^2$  respectively). This result indicates that the CTF binds to both dimers and tetramers of  $A\beta_{40}$ .

**Figure S1** An injection energy study of  $z/n=-5/2$  of a 1:5 mixture of  $A\beta_{42}$  and  $A\beta_{(39-42)}$ . ATDs are shown at injection voltages of 40 V (a) and 100 V (b).

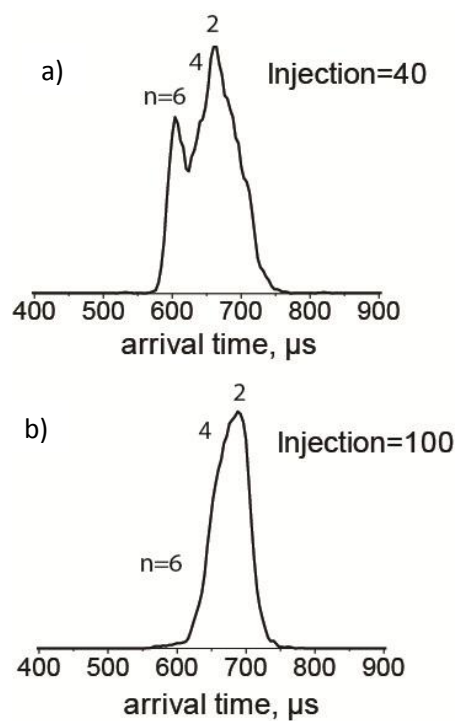

**Figure S2** ATD of  $z/n=-5/2$  of a 1:5 mixture of  $A\beta_{42}$  and  $A\beta(39-42)$  over time.

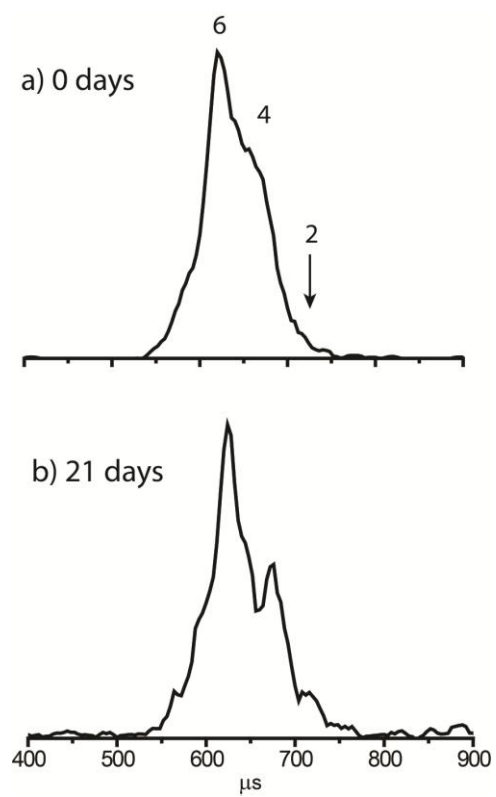

**Figure S3** ATD of  $z/n=-5/2$  of A $\beta$ 42 (a) and a 1:1 mixture of A $\beta$ 42 and A $\beta$ (39-42) (b). Features corresponding to the dimer through dodecamer are present (n=12, 10, 6, 4, 2).

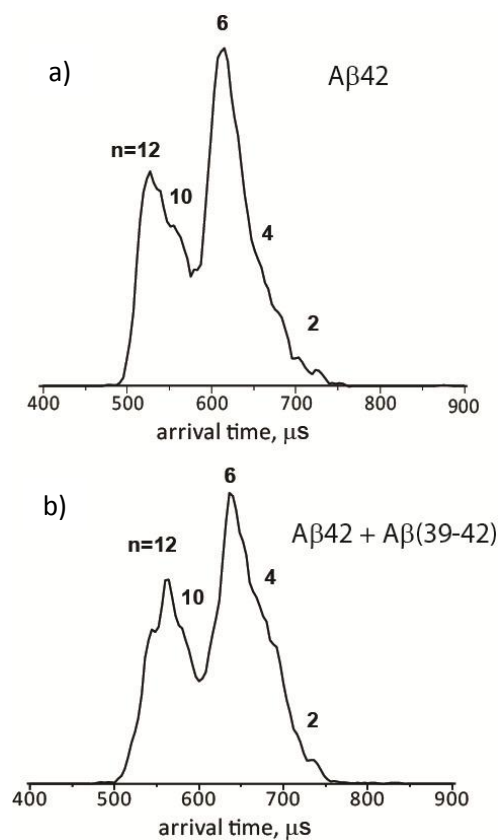

**Figure S4** ATD of  $z/n=-5/2$  for  $n[2A\beta_{40} + A\beta(39-42)]^{-5n}$ . Features corresponding to the dimer ( $n=2$ ) and tetramer ( $n=4$ ) are present, as determined by cross section measurements.

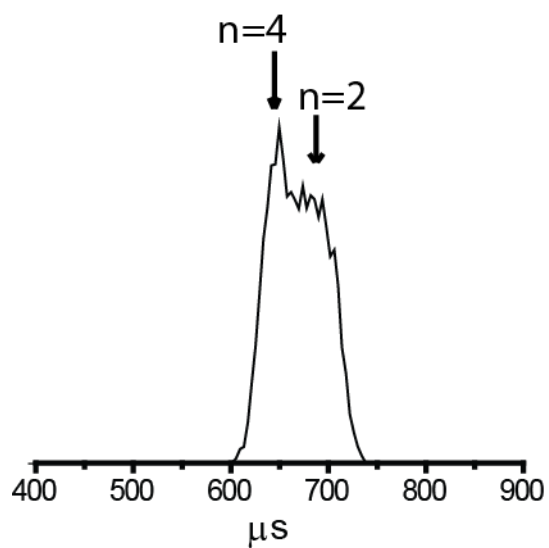

**Table S1** Experimental Cross sections of each feature in the  $z/n = -5/2$  ATD of A $\beta$ 42 and A $\beta$ 40 in solutions in the absence of presence of A $\beta$ (39-42).

| Solution                         | Cross Section ( $\text{\AA}^2$ ) |      |      |      |      |
|----------------------------------|----------------------------------|------|------|------|------|
|                                  | n=12                             | n=10 | n=6  | n=4  | n=2  |
| A $\beta$ 42 Blank               | 4470                             | 3870 | 2750 | 2339 | 1261 |
| A $\beta$ 42 + A $\beta$ (39-42) | n/a                              | n/a  | 2742 | 2290 | 1234 |
| A $\beta$ 40 Blank               | n/a                              | n/a  | n/a  | 2120 | 1260 |
| A $\beta$ 40 + A $\beta$ (39-42) | n/a                              | n/a  | n/a  | 2136 | 1241 |

### *The A $\beta$ :CTF complex*

The starting structures of  $\beta$ 42, A $\beta$ 40, and A $\beta$ (39-42) that were used for the binding simulation are shown in Figure S5. These are the most abundant structures from previous studies, as stated in the methods section of the main text. To validate our choice of force field, we have carried out an additional MD simulation of A $\beta$ 42 only using the same protocol as our binding simulations for comparison with the NMR data (Figure S6). The calculated J-coupling data show a moderate agreement with the experimental data, which is comparable to the performance by the OPLS force field, the best one among others (AMBER ff94, ff96, GROMOS) examined by Sgourakis et al(22). In addition, strong propensity to form helical structure was not observed. This is consistent with the recent study(30) that shows that both AMBER ff03 and ff99SB offer significant improvements in the balance between helix and  $\beta$ -sheet, compared to early versions (ff94, ff96 and ff99). For the binding simulation, four trajectories were run for A $\beta$ (39-42) binding to A $\beta$ 42 (Figure S7) and for A $\beta$ (39-42) binding to A $\beta$ 40 (Figure S8). For each system, if the number of atom contacts was greater than 20, the system was designated as being in a bound state. If the total number of contacts was less than 20, A $\beta$ (39-42) was considered unbound.

The resulting, bound systems were grouped into different structural families based on the C $\alpha$  root mean square deviation (RMSD) of the complex (cutoff of 5 Å) using the GROMACS protocol. Representative complexes of A $\beta$ 42 and A $\beta$ (39-42) from the most populated structural families (a-f) are shown in Figure S9. Representative complexes of A $\beta$ (39-42) binding to A $\beta$ 40 from the most populated structural families (A-F) are shown in Figure S10.

Experimental collision cross sections were measured in IMS experiments for A $\beta$ 42 and A $\beta$ 40 with one and two CTFs bound (Figure S11; Table S2). The ATD of each species shows two features, similar to the ATD of A $\beta$  with no CTFs bound (also shown in Figure S11). We have previously shown that, in the case of wild-type A $\beta$ 40 and A $\beta$ 42, these features correspond to a compact gas phase structure and an extended, solution-like structure. Similarly, in each case the feature at shorter arrival times has a cross section that is much smaller than any of the dehydrated structures calculated, suggesting that this feature is, in fact, a compact gas-phase structure. In both the case of the A $\beta$ 40:CTF and A $\beta$ 42:CTF complex, the cross section of the feature at longer arrival times is in good agreement with the cross sections of the dehydrated,



solution-phase structures (Fig S11). Although we do not have MD-calculated structures for A $\beta$ 40 and A $\beta$ 42 with two CTFs bound, we see a similar trend of ATDs with two features, suggesting that again, this ATD consist of a compact, gas-phase structure and a more extended, solution-like structure.

**Figure S5** The starting structures of A $\beta$ 42, A $\beta$ 40, and A $\beta$ (39-42), as derived from previous studies. The side-chains of E22, D23 and K28 are shown (blue: positively charged, red: negatively charged). The  $\alpha$ -helical, 3-10-helical,  $\beta$ -extended,  $\beta$ -bridged, turn and coiled conformations are colored in purple, blue, yellow, tan, cyan and white. The positively charged N-termini and negatively charged C-termini are indicated by blue and red balls, respectively.

A $\beta$ 42

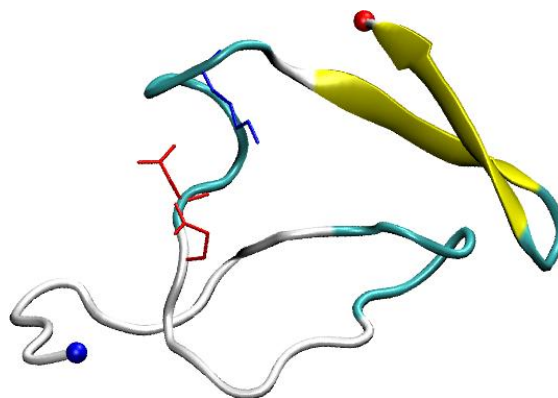

A $\beta$ 40

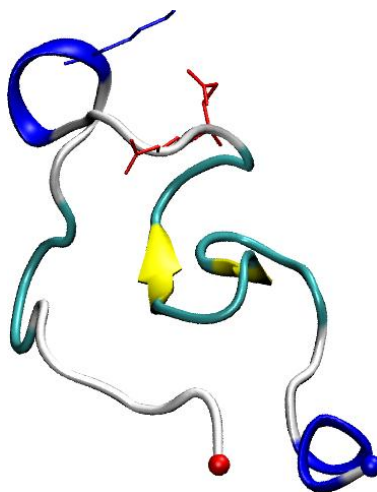

A $\beta$ (39-42)

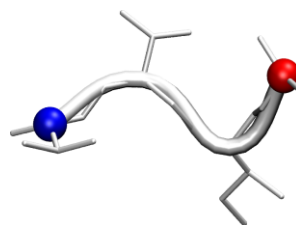

**Figure S6** Force field validation. A: J-coupling data ( $^3J_{\text{HNH}\alpha}$ ) from the study by *Sgourakis et al* (22) B: Secondary structure propensity. The calculation is from the 150 ns MD simulation of A $\beta$ 42 alone, using the same protocol as in our binding simulations. The correlation coefficient between the experiment and the simulation data is 0.48, which is slightly better than 0.43 of the simulation using the OPLS force field (22). There is no strong helical propensity over the duration of the simulation.

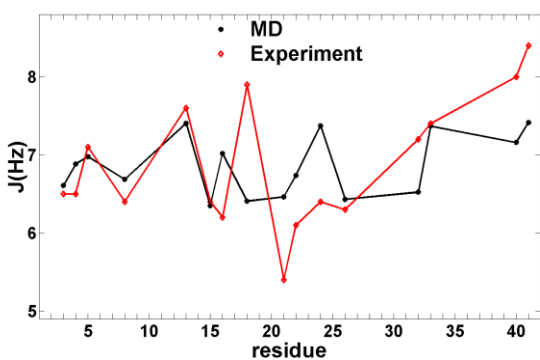

**A**

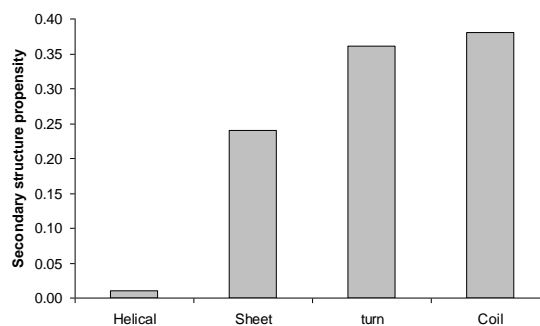

**B**

**Figure S7** Binding of A $\beta$ (39-42) to A $\beta$ 42 in each of the 4 trajectories. The distance cutoff for atom contacts between two peptides is set to be 3 Å.

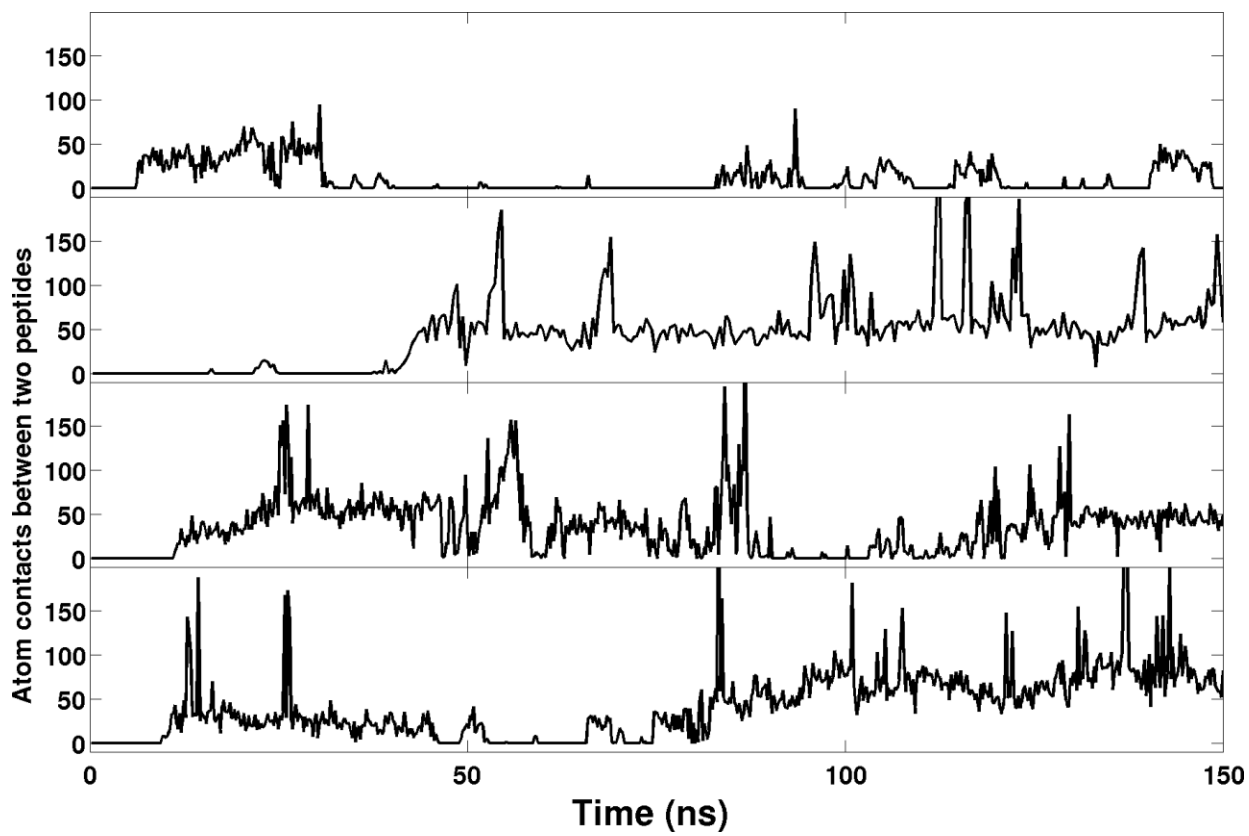

**Figure S8** Binding of A $\beta$ (39-42) to A $\beta$ 40 in each of the 4 trajectories. The distance cutoff for atom contacts between two peptides is set to be 3 Å.

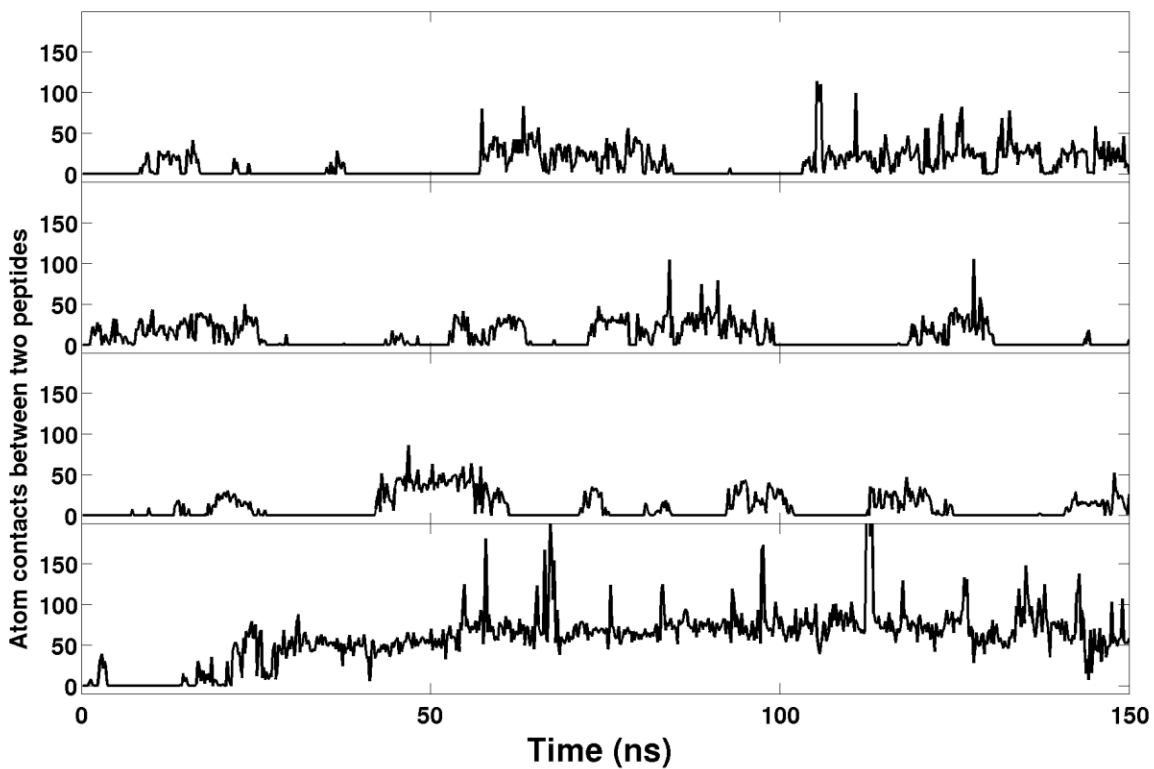

**Figure S9** Representative structures of the A $\beta$ (39-42):A $\beta$ 42 complexes from the most populated structural families (a-f). Only the side-chains in contact with A $\beta$ (39-42) are shown (blue: positively charged, red: negatively charged and black: hydrophobic). The backbone of A $\beta$ (39-42) is also in black.  $\alpha$ -helical, 3-10-helical,  $\beta$ -extended,  $\beta$ -bridged, turn and coiled conformations of A $\beta$ 42 are colored in purple, blue, yellow, tan, cyan and white, respectively. The positively charged N-termini and negatively charged C-termini are indicated by blue and red balls respectively. The abundance is noted below each structure.

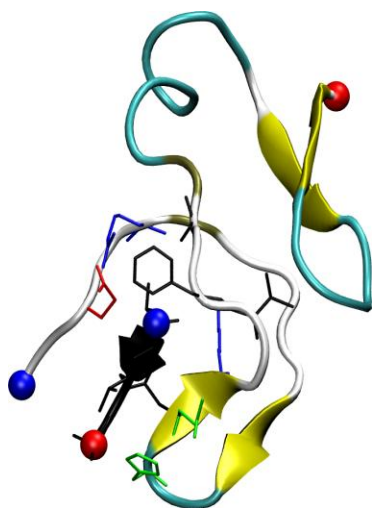

**a (29%)**

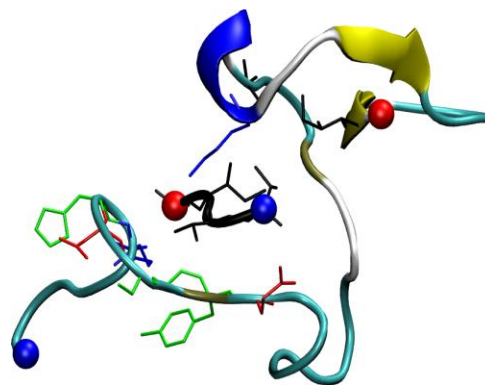

**b (15%)**

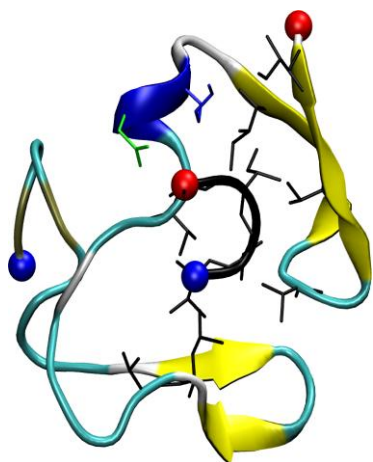

**c (13%)**

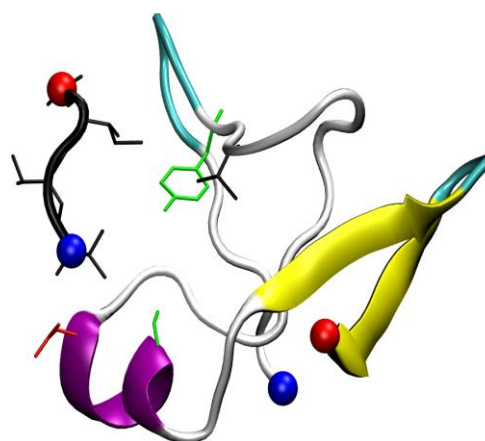

**d (9%)**

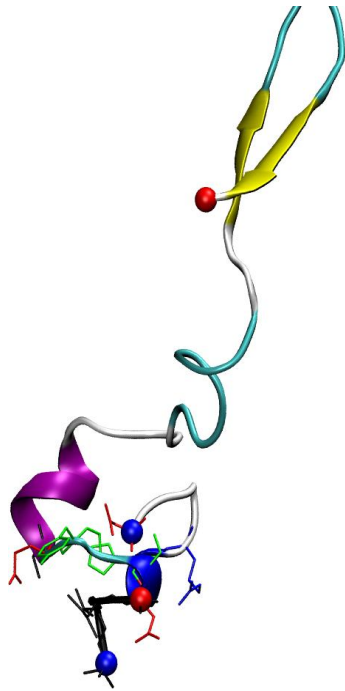

**e (8%)**

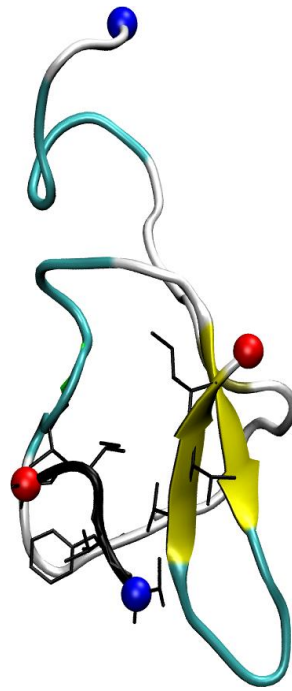

**f (5%)**

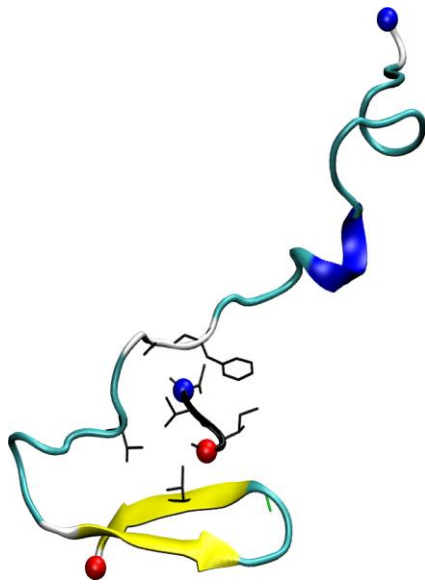

**g (4%)**

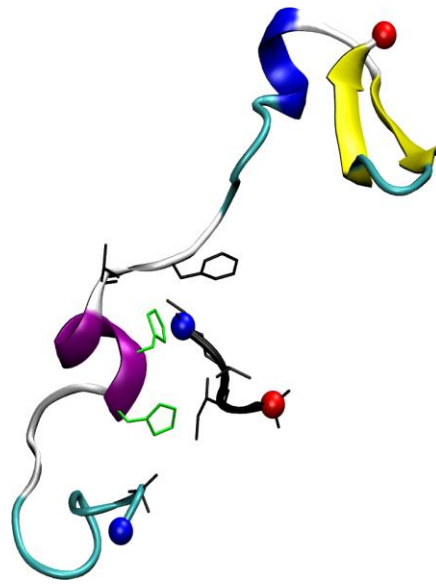

**h (2%)**

**Figure S10** Representative structures of the A $\beta$ 42:A $\beta$ (39-42) complex from the most populated structural families(A-F). Only the side-chains in contact with A $\beta$ (39-42) are shown (blue: positively charged, red: negatively charged and black: hydrophobic). The backbone of A $\beta$ (39-42) is also shown in black. The  $\alpha$ -helical, 3-10-helical,  $\beta$ -extended,  $\beta$ -bridged, turn and coiled conformations of A $\beta$ 42 are shown in purple, blue, yellow, tan, cyan and white, respectively. The positively charged N-termini and negatively charged C-termini are indicated by blue and red balls, respectively. The abundance is noted below each structure.

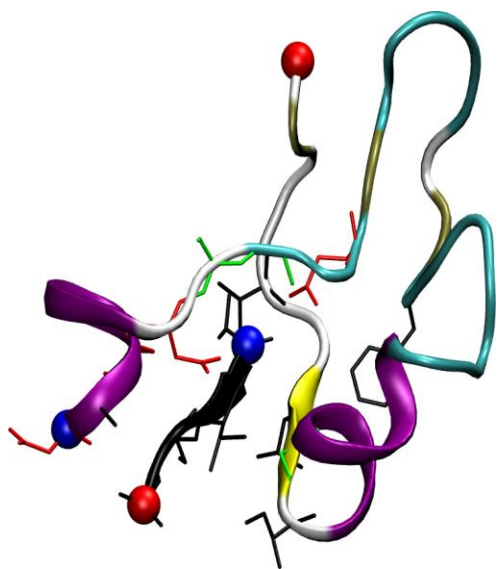

**A (38%)**

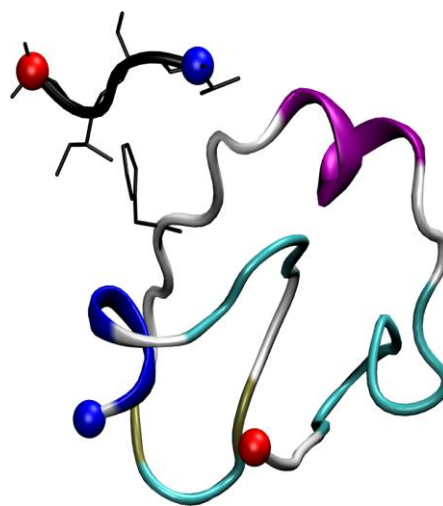

**B (18%)**

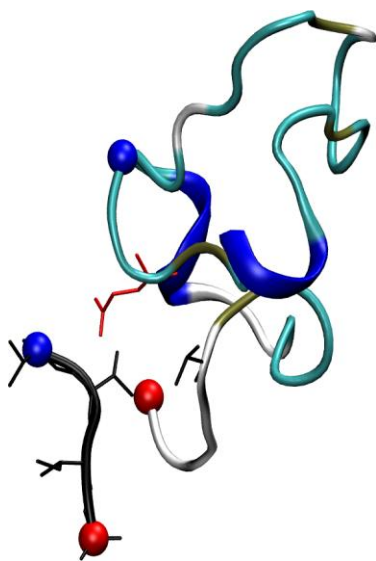

**C (13%)**

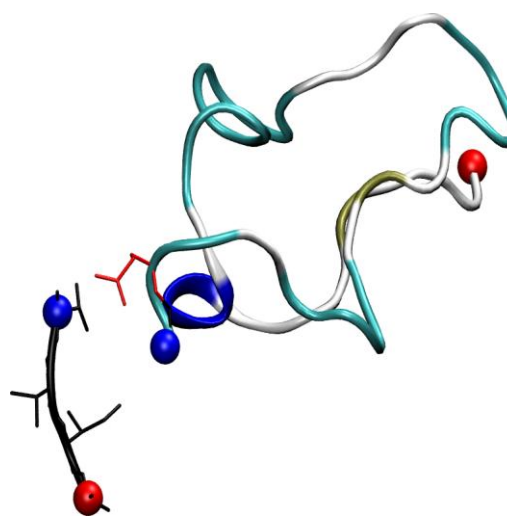

**D (11%)**



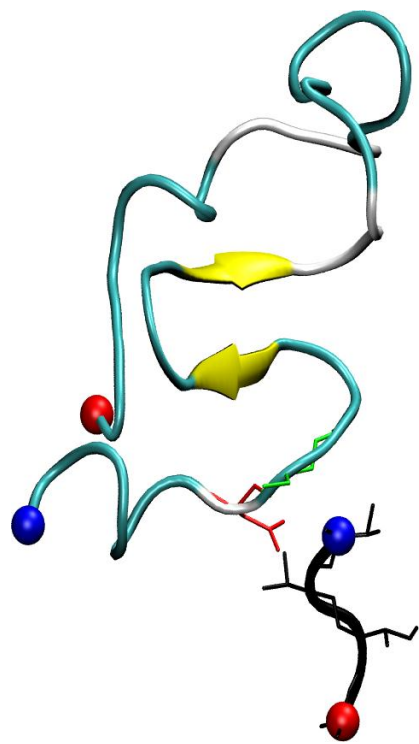

**E (11%)**

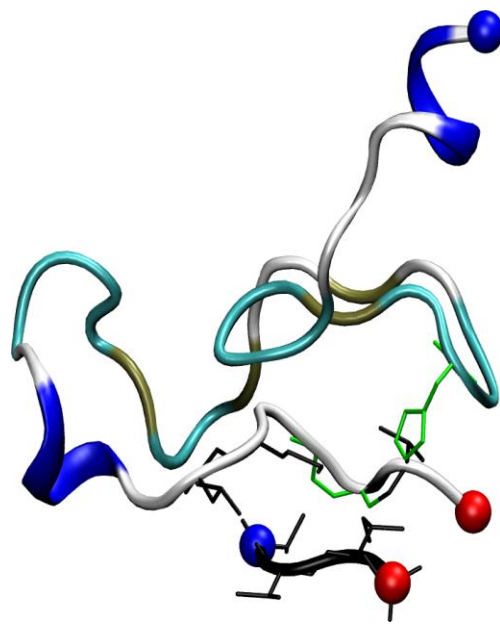

**F (3%)**

**Figure S11** ATDs of  $z/n=-3$  of  $A\beta$ ,  $A\beta$  bound with one  $A\beta(39-42)$  peptide, and  $A\beta$  bound with two  $A\beta(39-42)$  peptides (Above:  $A\beta$ , Below:  $A\beta$ ).

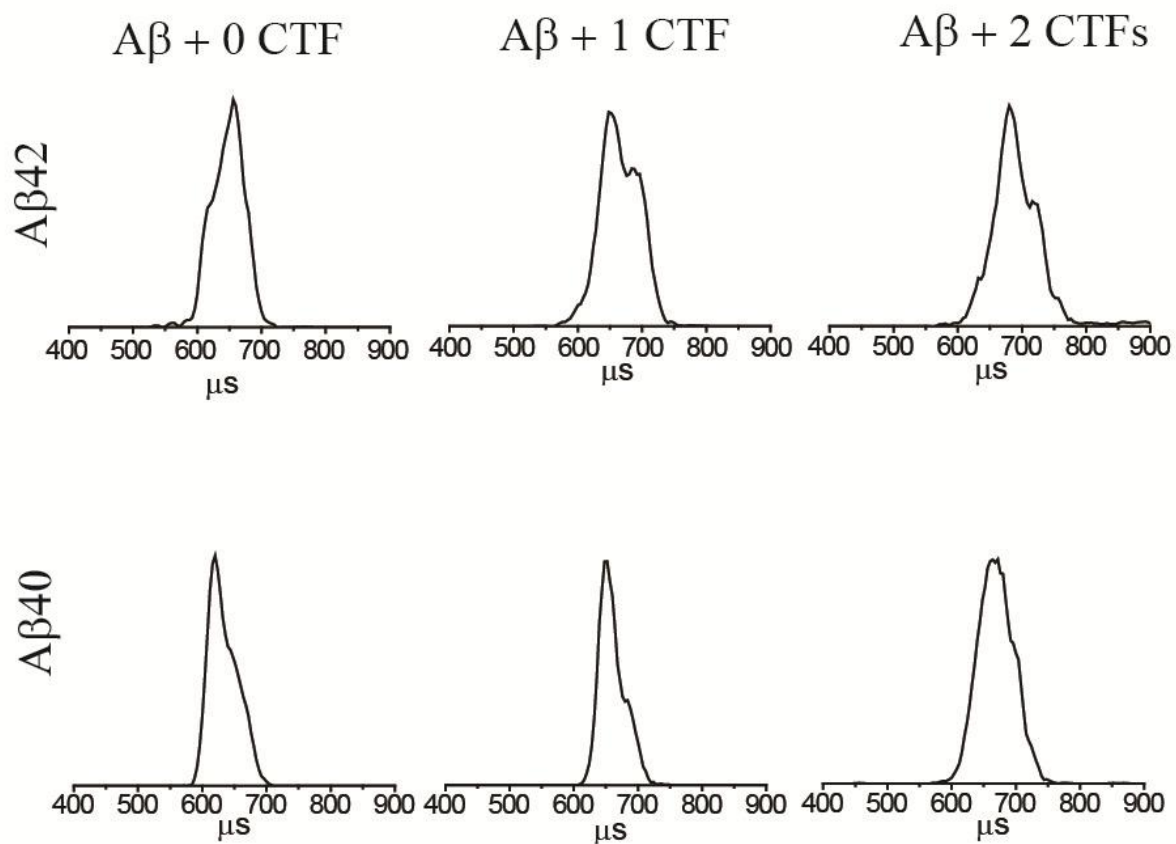

**Table S2** Experimental Cross sections of the  $z/n=-3$  charge state of A $\beta$ 42 and A $\beta$ 40 with and without A $\beta$ (39-42). Two features were present for every ATD and the cross section of both features is provided in each case. Experimental error is included for each measurement, as well.

|              | Cross Section ( $\text{\AA}^2$ ) |              |              |              |              |              |
|--------------|----------------------------------|--------------|--------------|--------------|--------------|--------------|
|              | 0 CTF                            |              | 1 CTF        |              | 2 CTF        |              |
| A $\beta$ 42 | $636 \pm 7$                      | $693 \pm 5$  | $698 \pm 11$ | $729 \pm 12$ | $751 \pm 13$ | $780 \pm 12$ |
| A $\beta$ 40 | $617 \pm 9$                      | $679 \pm 12$ | $650 \pm 5$  | $689 \pm 3$  | $651 \pm 12$ | $701 \pm 10$ |
